# Supplementary material
Source: PubMed Central journal article supplement (PMC6195442)
Supplement: NIHMS967625-supplement-supplement_1.pdf [file NIHMS967625-supplement-supplement_1.pdf]

## Supporting Information

### Advantages of Molecular Weight Identification during Native MS

#### Screening

Ahad Khan<sup>1</sup>, Anne Bresnick<sup>2</sup>, Sean Cahill<sup>2</sup>, Mark Girvin<sup>2</sup>, Steve Almo<sup>2</sup>, Ronald Quinn<sup>1</sup>

#### Affiliations

<sup>1</sup>Griffith Institute for Drug Discovery, Griffith University, Brisbane, Australia

<sup>2</sup>Albert Einstein College of Medicine, NY, USA

#### Correspondence

*Prof. Ronald J. Quinn*

Griffith Institute for Drug Discovery

Griffith University

Brisbane, QLD, 4111

Australia

Phone: +61 7 373 56006

Fax: +61 7 373 56001

r.quinn@griffith.edu.au

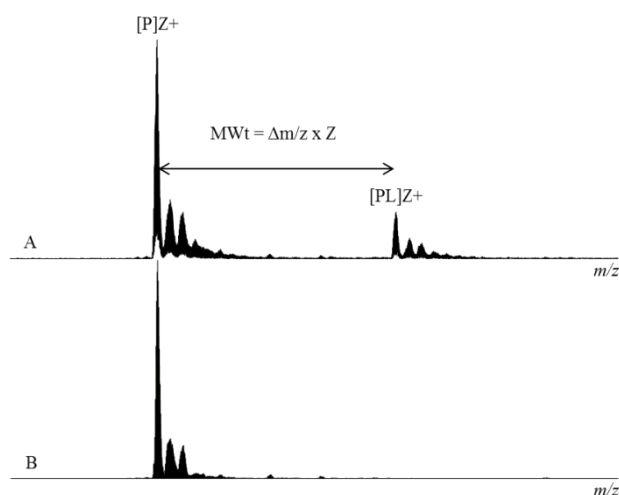

**Fig. 1S** Hit detection and molecular weight (MW) determination in ESI-FTMS screening. In **B**, the spectrum shows only a protein peak,  $[P]Z^+$ , and in **A**, the spectrum shows a protein peak,  $[P]Z^+$ , and a protein-ligand complex peak ( $[PL]Z^+$ ). Here,  $Z^+$  is the charge state of the protein in the positive ionization mode. MW of the ligand (hit) is calculated from the mass difference ( $\Delta m/z \times Z$ ).

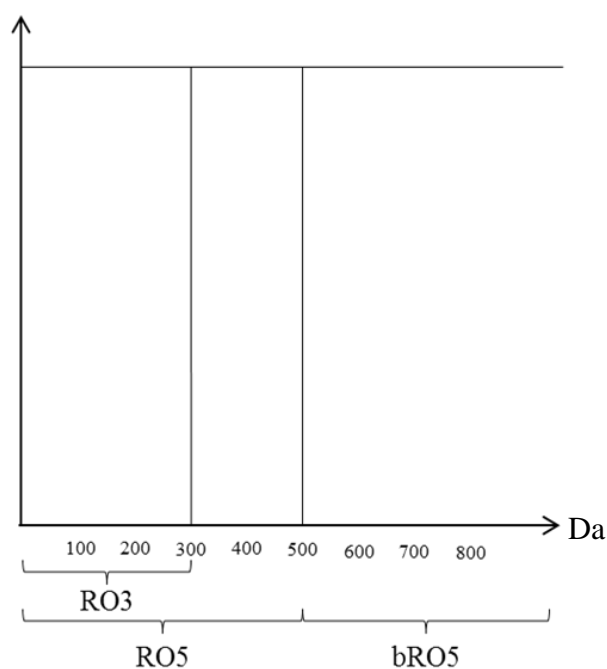

**Fig. 2S** Chemical subspaces of hits based on their molecular weights. The hits with a molecular weight  $< 300$  Da were categorized as lead-like compounds (RO3) and hits with a molecular weight  $< 500$  Da were categorized as drug-like compounds (RO5). The compounds with a molecular weight  $> 500$  Da were beyond the “rule of five” (bRO5).

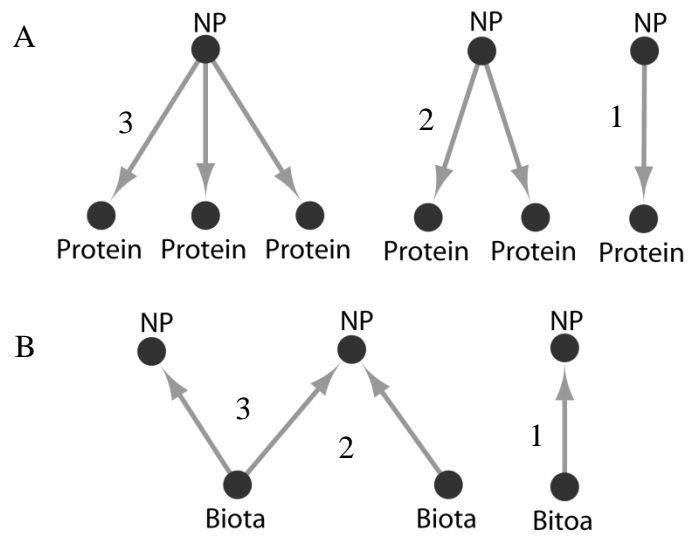

**Fig. 3S** Unique and common hits based on molecular weights. NP = natural product. The unique hits showed binding to only one protein (A1) and the common hits showed binding to more than one protein (A2 & A3). The hits (NP) were detected from one (B1) or multiple biota (B2) or multiple hits from one biota (B3).

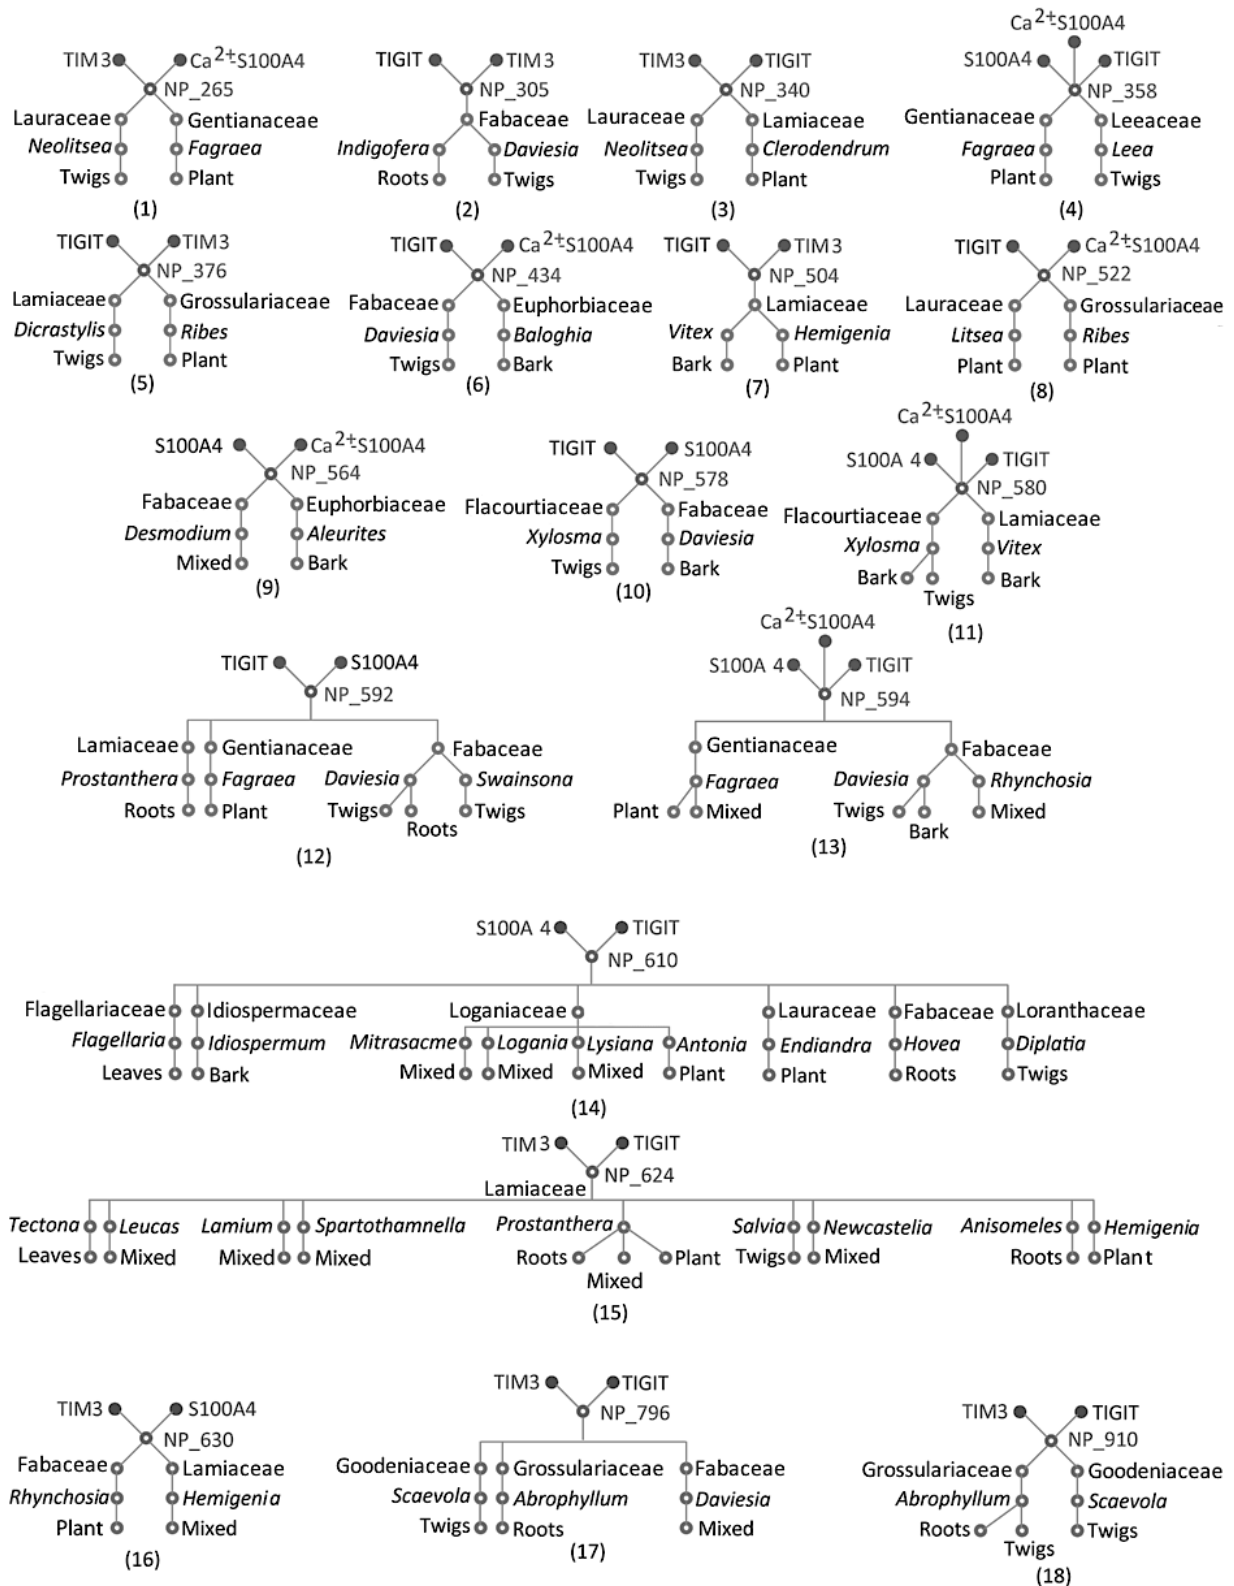

**Fig. 4S** Common hits and their taxonomical classes, parts of the plants used, and the proteins.

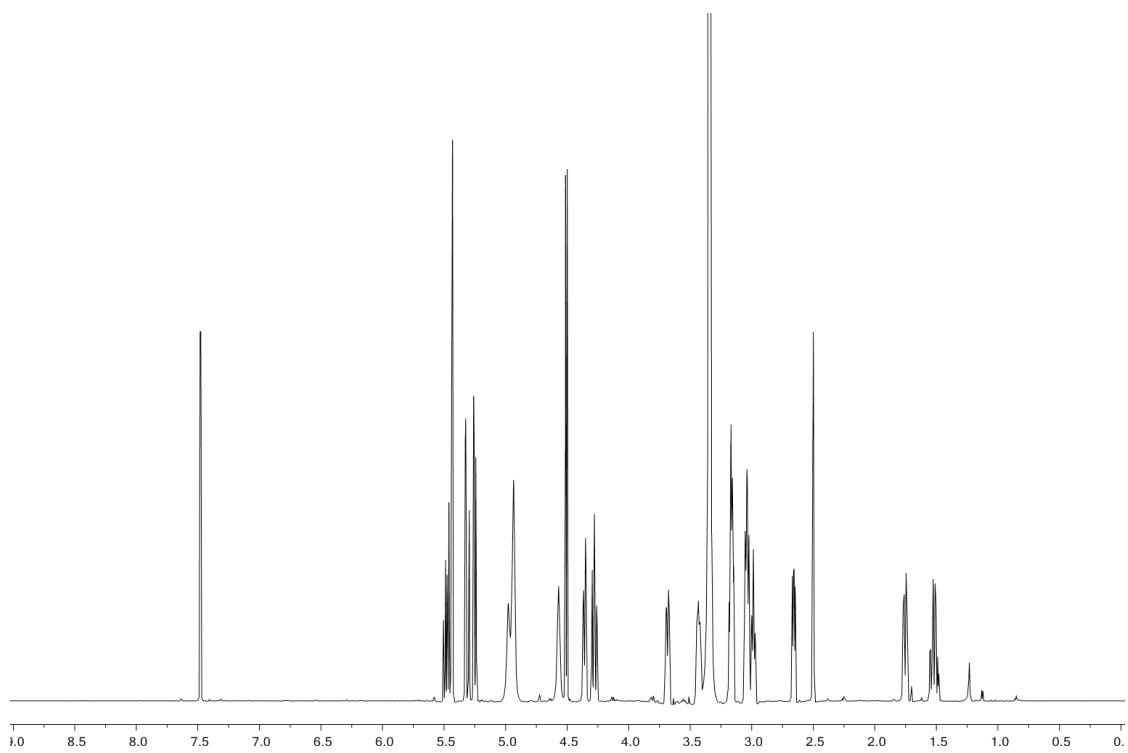

**Fig. 5S**  $^1\text{H}$ -NMR spectrum of NP\_358 acquired in  $\text{DMSO-}d_6$  (800 MHz).

**Fig. 6S**  $^{13}\text{C}$ -NMR spectrum of NP\_358 acquired in  $\text{DMSO-}d_6$  (800 MHz).

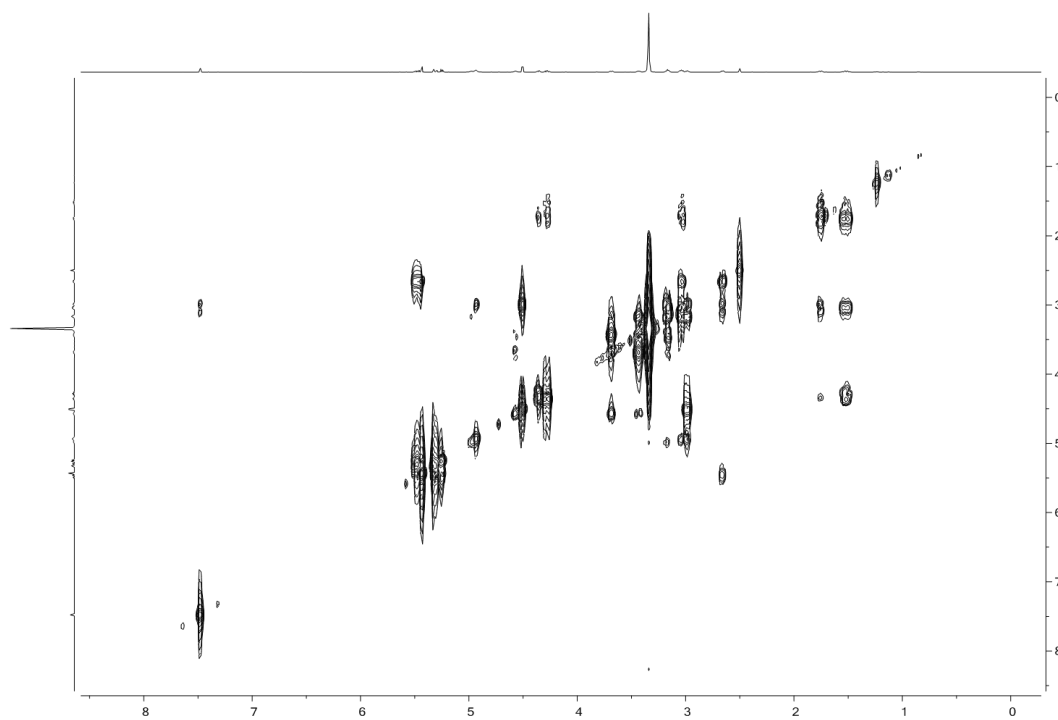

**Fig. 7S** gCOSY spectrum of NP\_358 acquired in DMSO-*d*<sub>6</sub> (800 MHz).

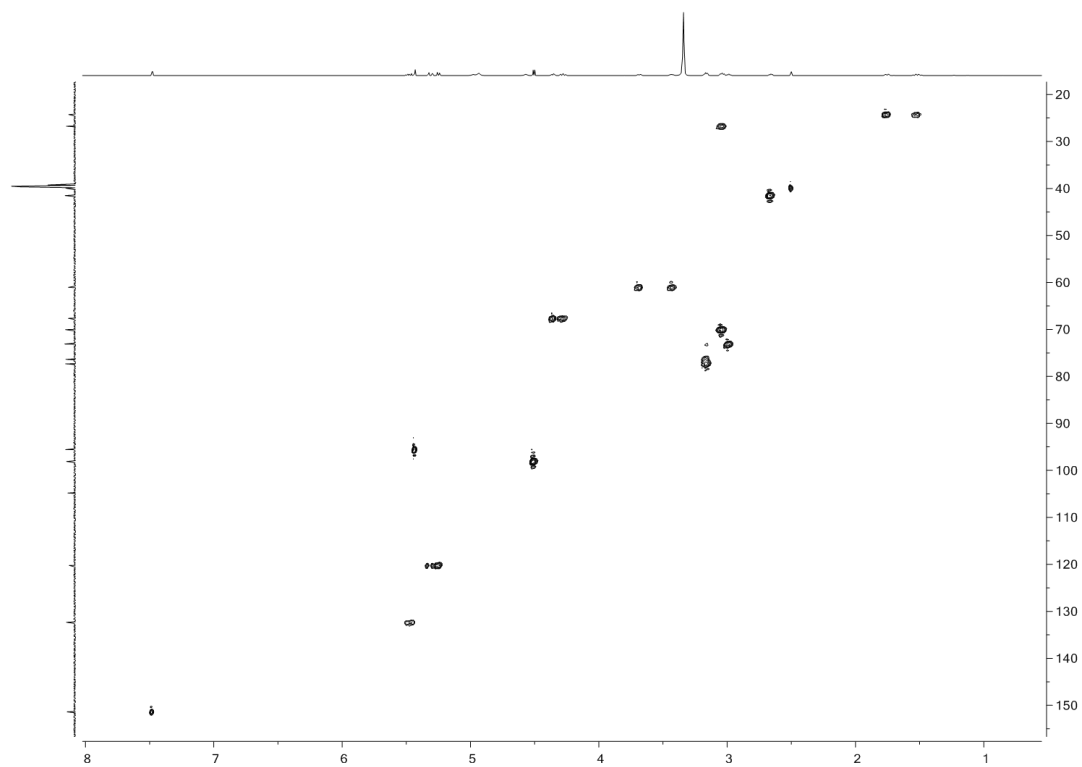

**Fig. 8S** HSQCAD spectrum of NP\_358 acquired in DMSO-*d*<sub>6</sub> (800 MHz).

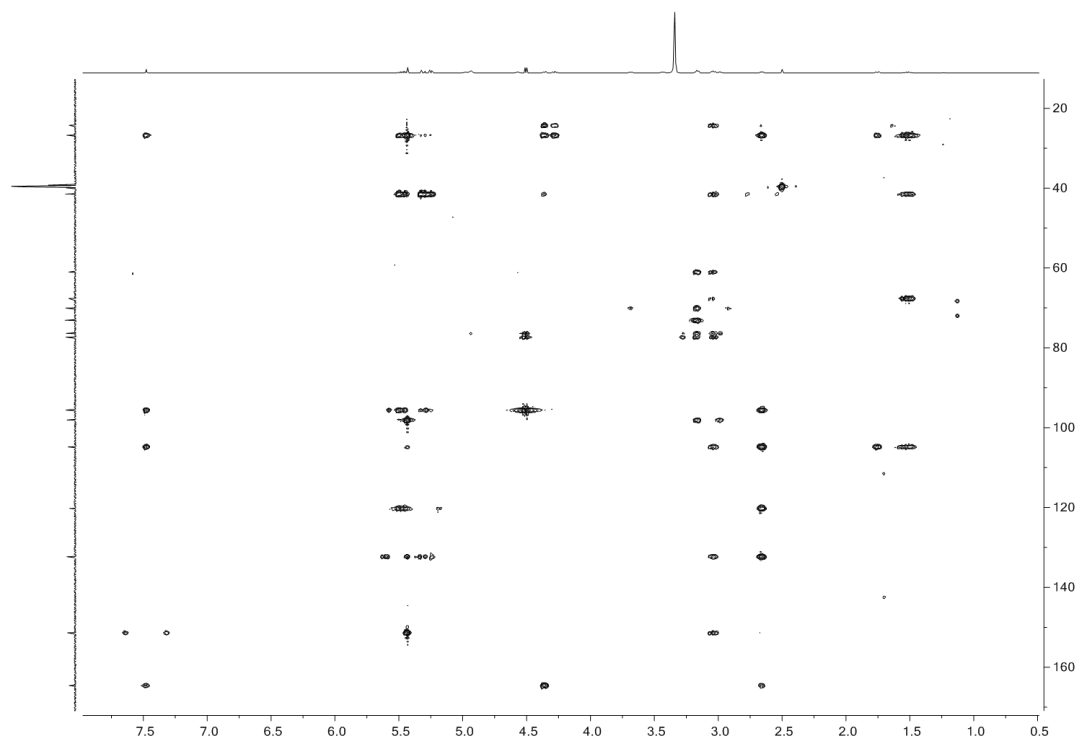

**Fig. 9S** HMBCAD spectrum of NP\_358 acquired in DMSO-*d*<sub>6</sub> (800 MHz).

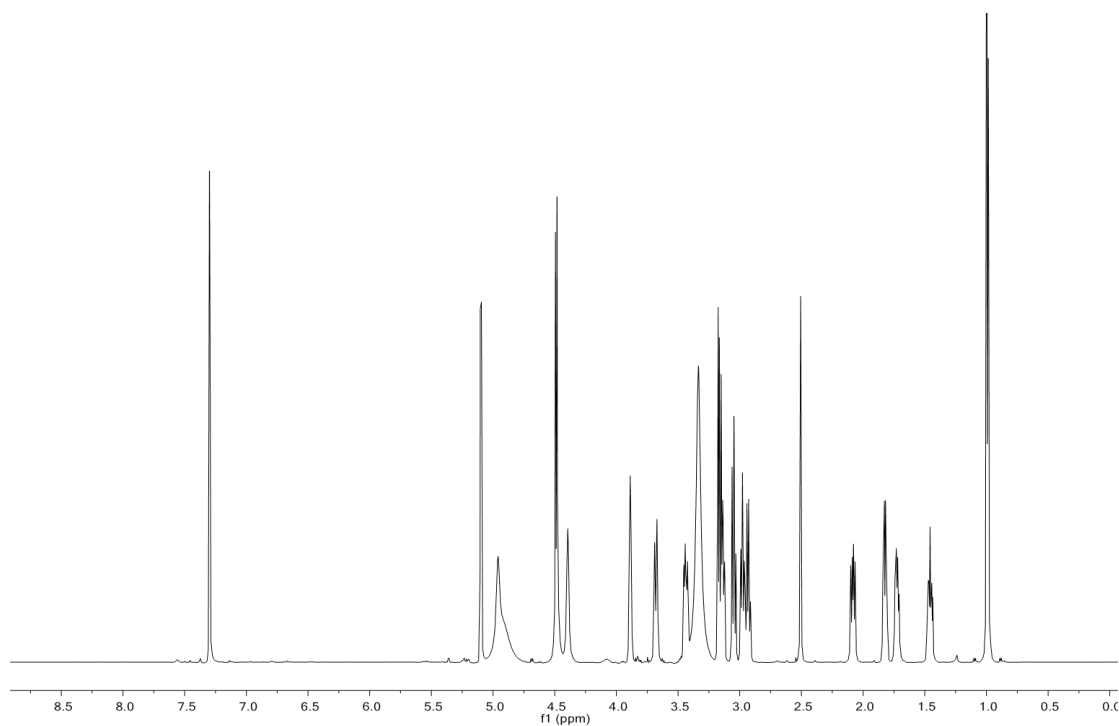

**Fig. 10S** <sup>1</sup>H-NMR spectrum of NP\_376 acquired in DMSO-*d*<sub>6</sub> (800 MHz).

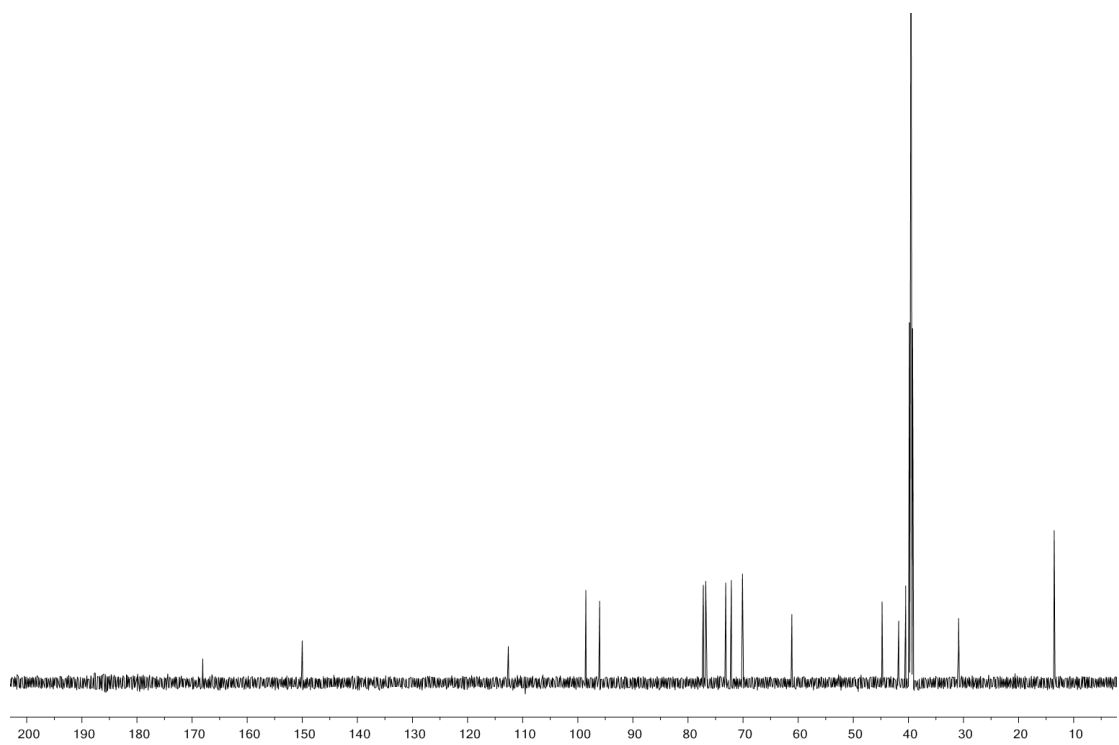

**Fig. 11S** <sup>13</sup>C-NMR spectrum of NP\_376 acquired in DMSO-*d*<sub>6</sub> (800 MHz).

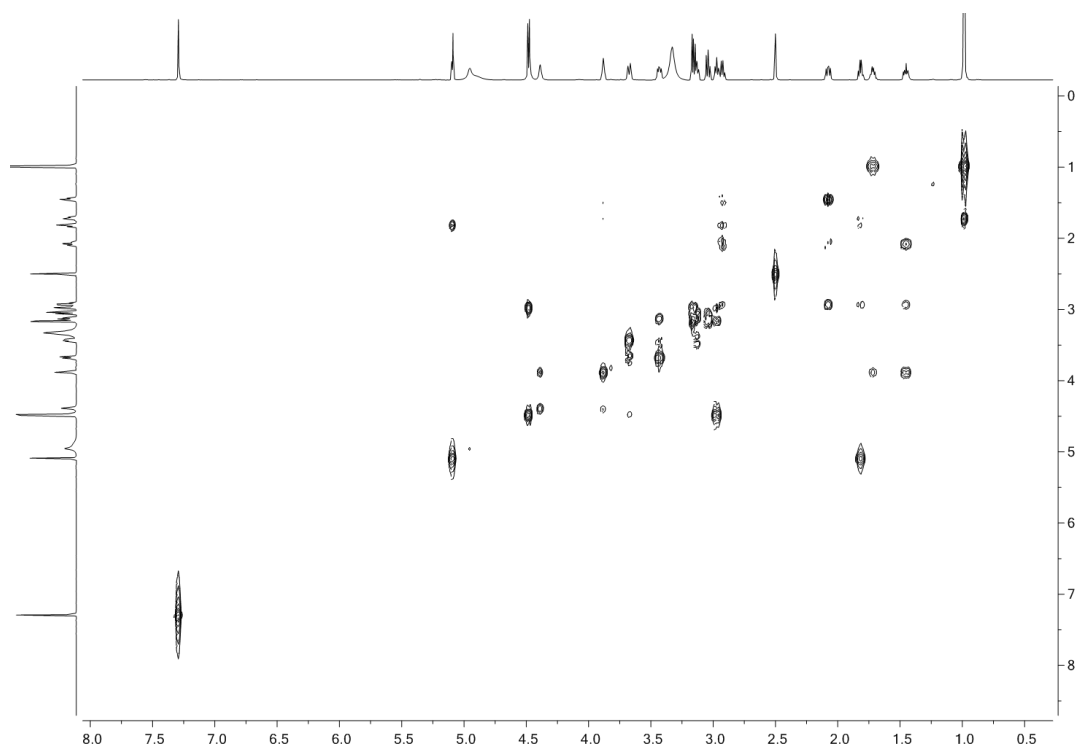

**Fig. 12S** gCOSY spectrum of NP\_376 acquired in DMSO-*d*<sub>6</sub> (800 MHz).

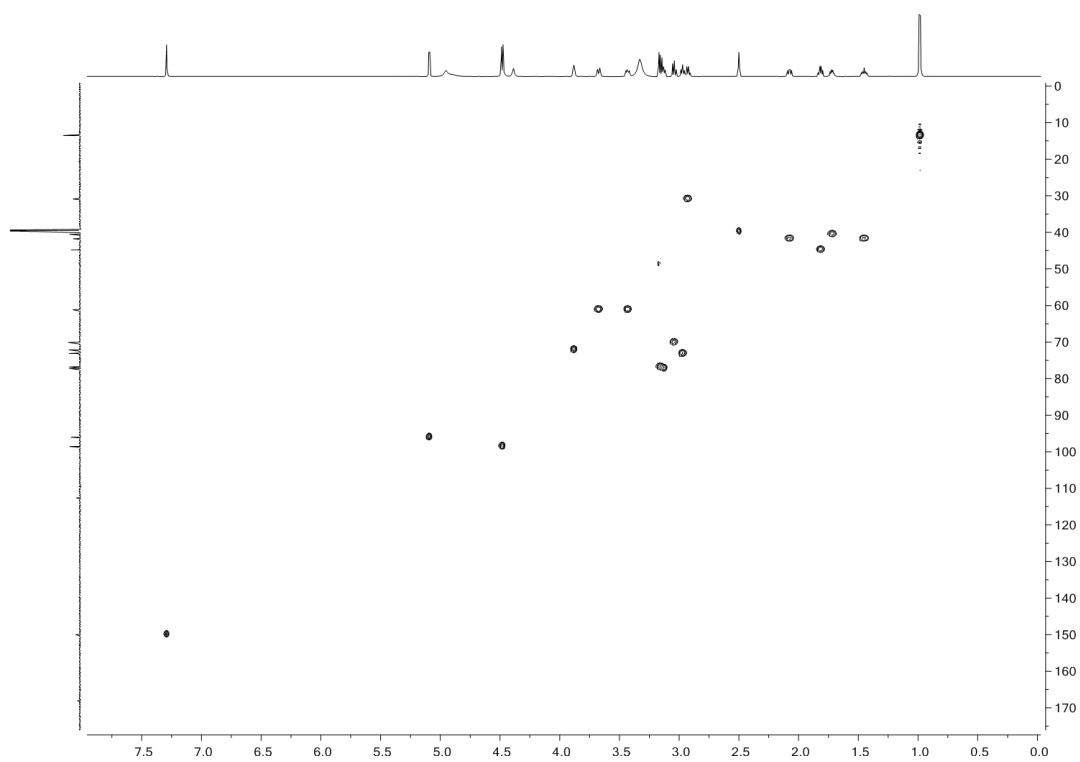

**Fig. 13S** HSQCAD spectrum of NP\_376 acquired in DMSO-*d*<sub>6</sub> (800 MHz).



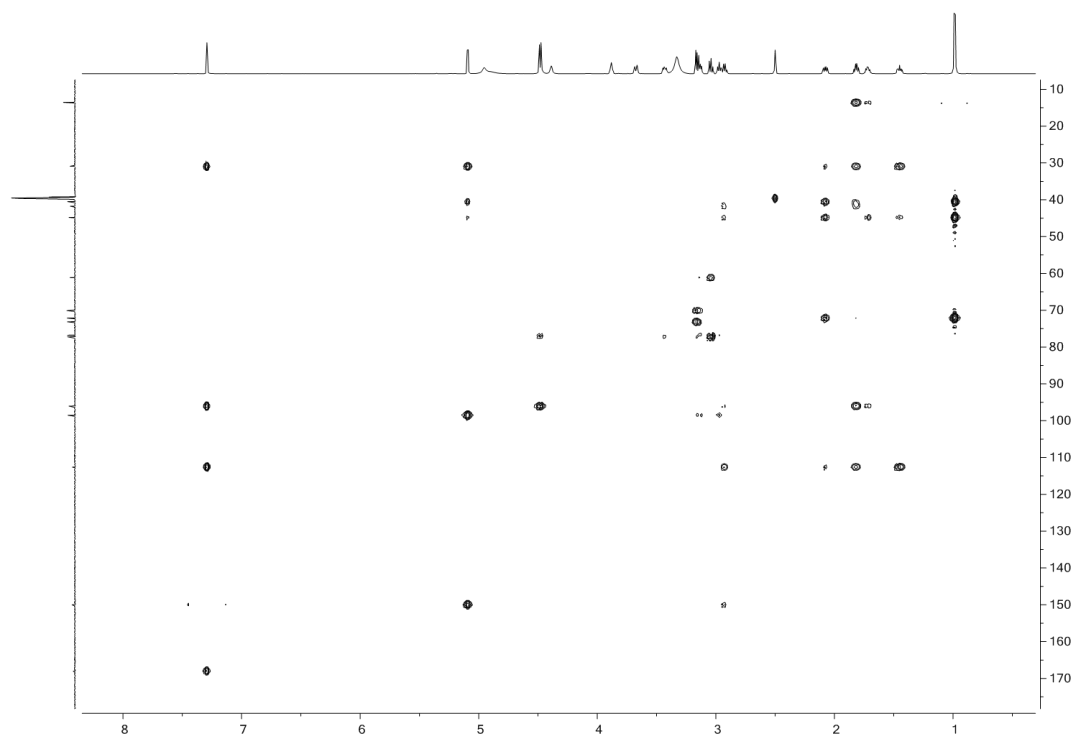

**Fig. 14S** HMBCAD spectrum of NP\_376 acquired in DMSO- $d_6$  (800 MHz).

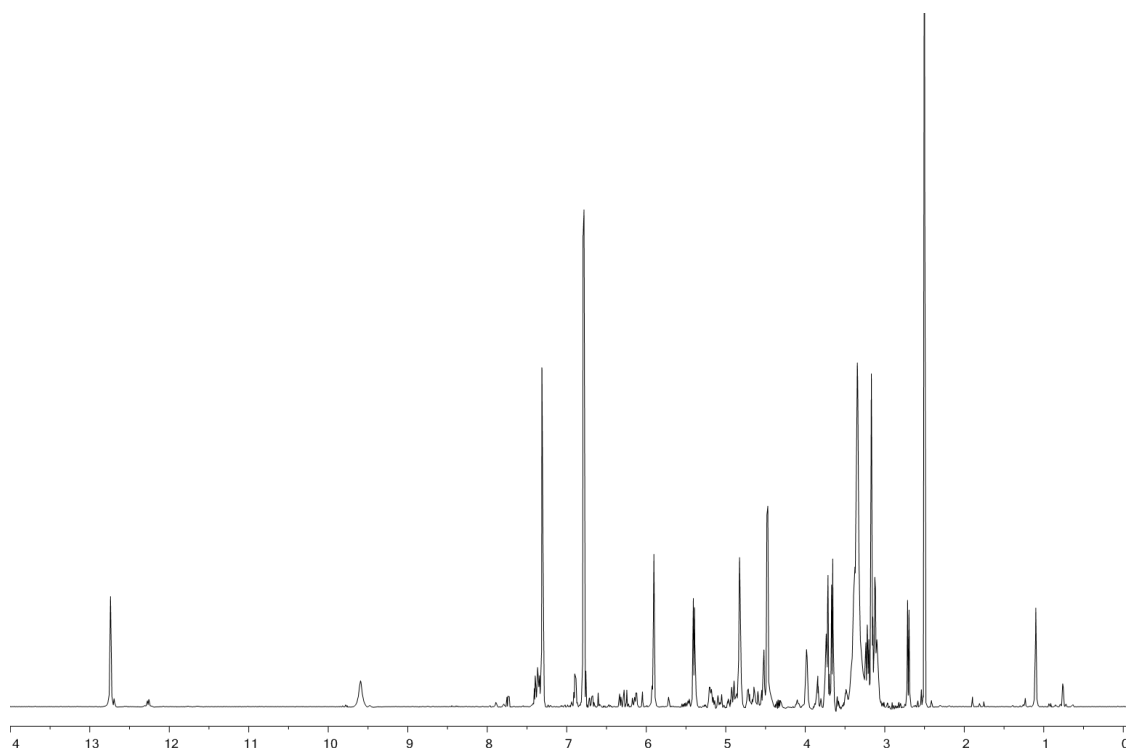

**Fig. 15S**  $^1\text{H}$ -NMR spectrum of NP\_434 acquired in DMSO- $d_6$  (800 MHz).

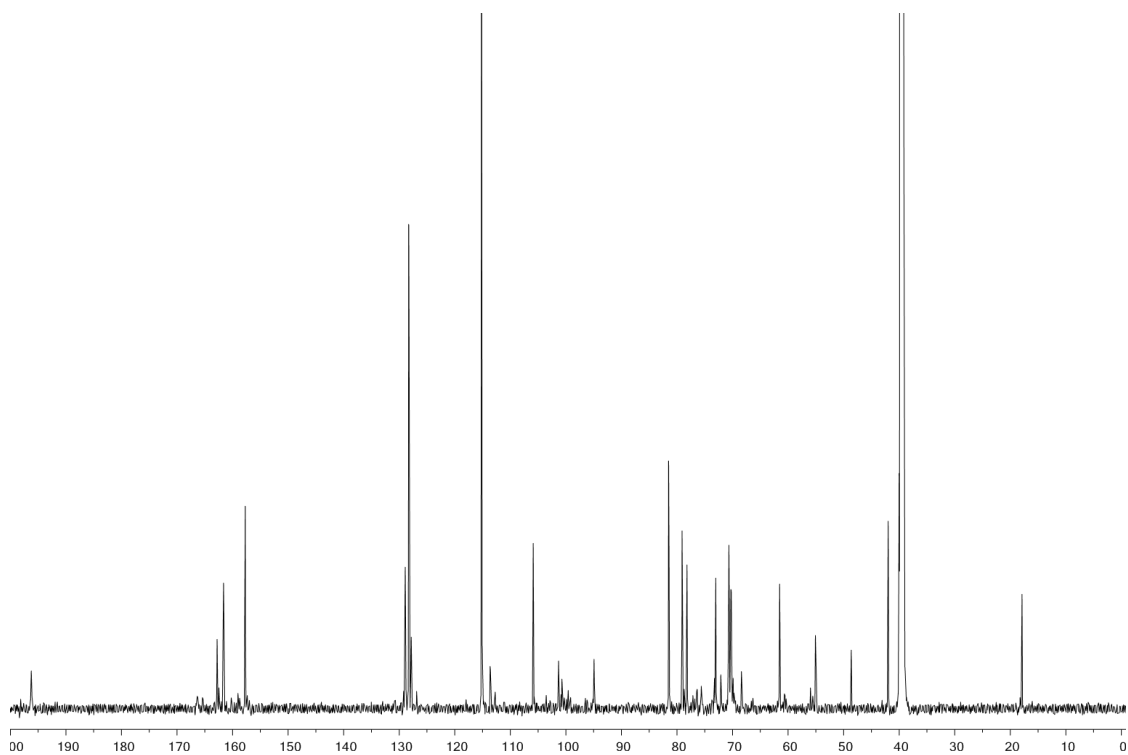

**Fig. 16S**  $^{13}\text{C}$ -NMR spectrum of NP\_434 acquired in DMSO- $d_6$  (800 MHz).

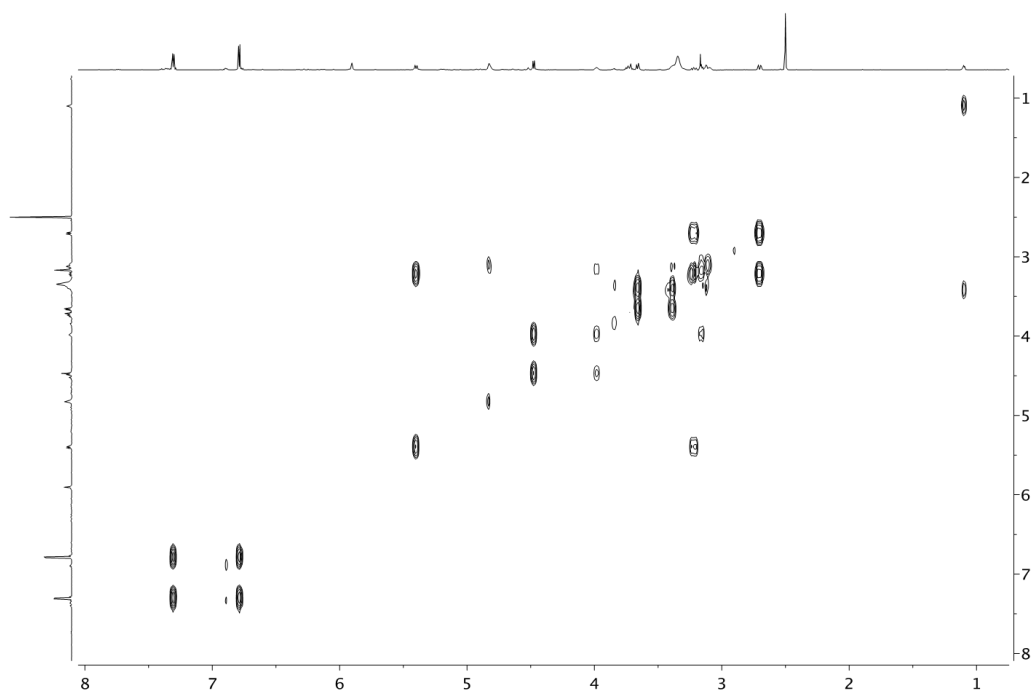

**Fig. 17S** gCOSY spectrum of NP\_434 acquired in DMSO- $d_6$  (800 MHz).

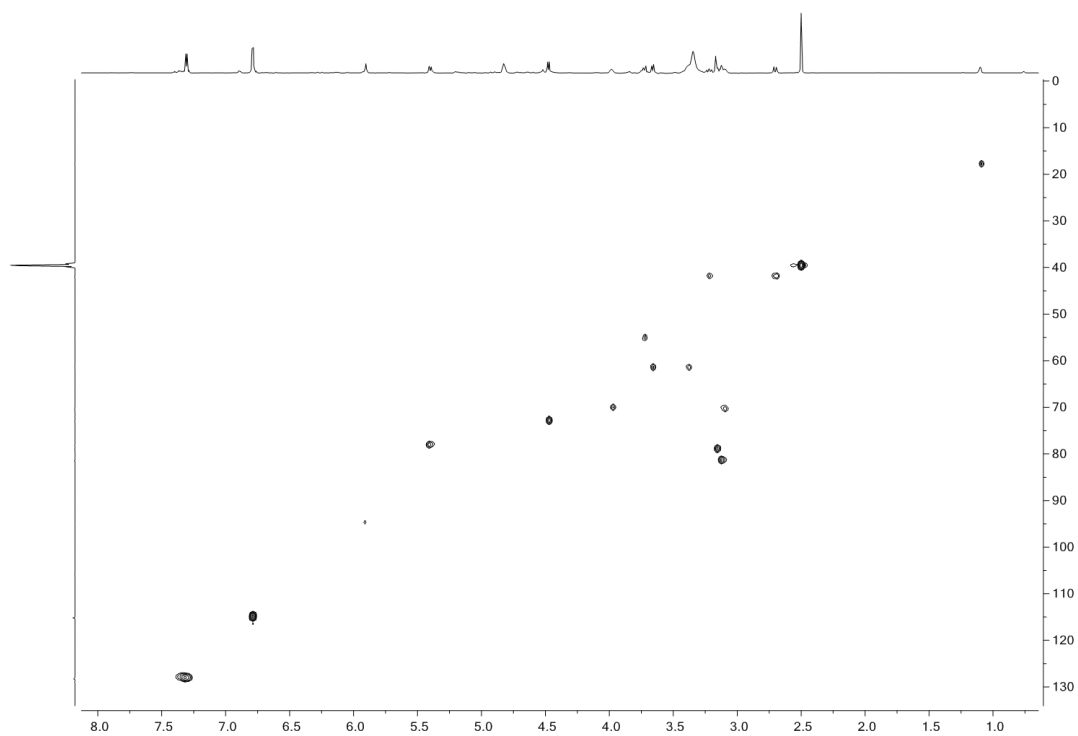

**Fig. 18S** HSQCAD spectrum of NP\_434 acquired in DMSO- $d_6$  (800 MHz).

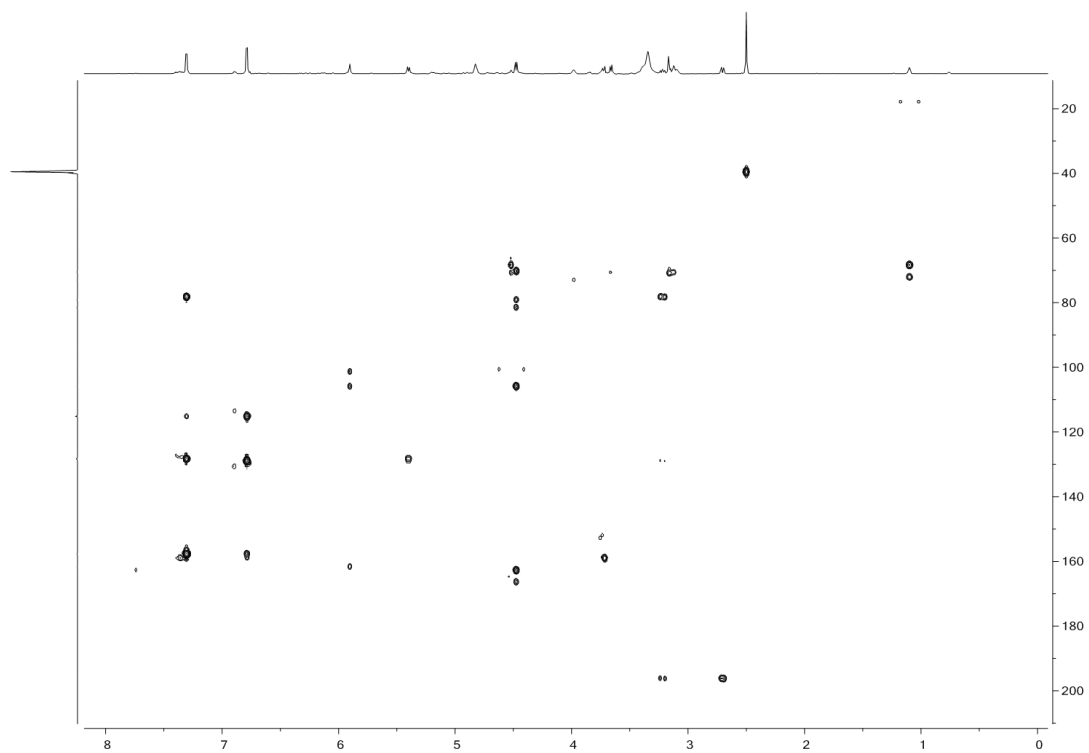

**Fig. 19S** HMBCAD spectrum of NP\_434 acquired in DMSO- $d_6$  (800 MHz).

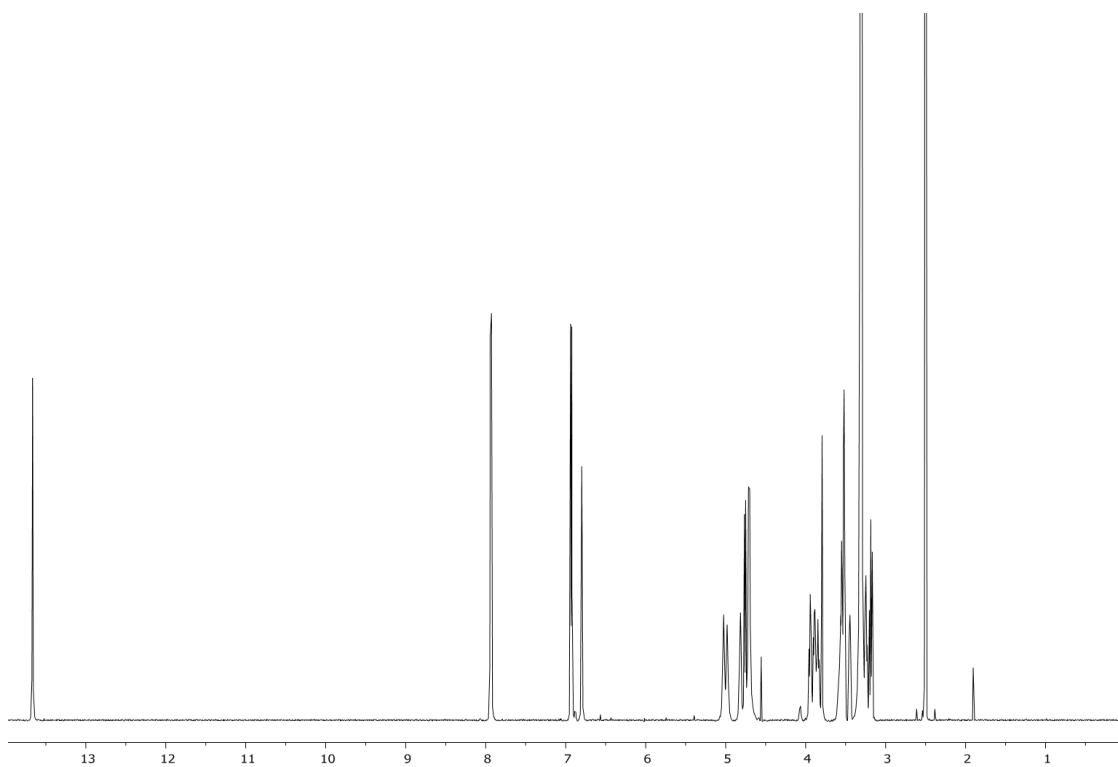

**Fig. 20S** <sup>1</sup>H-NMR spectrum of NP\_564 acquired in DMSO-*d*<sub>6</sub> (800 MHz).

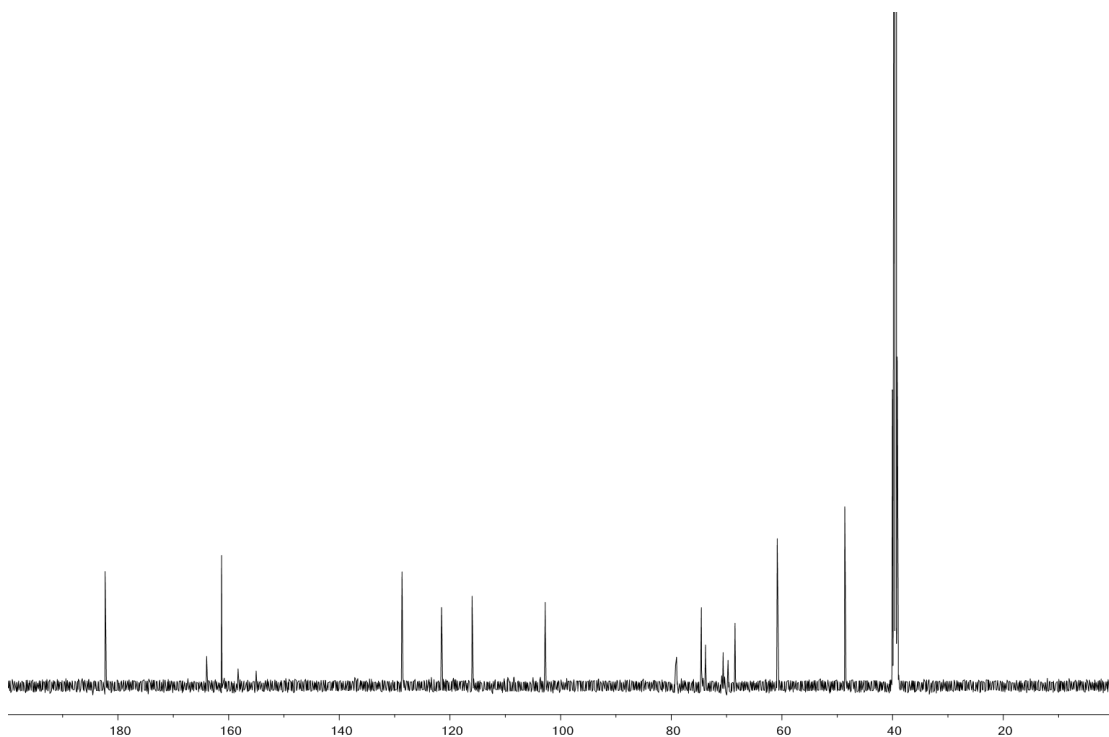

**Fig. 21S** <sup>13</sup>C-NMR spectrum of NP\_564 acquired in DMSO-*d*<sub>6</sub> (800 MHz).

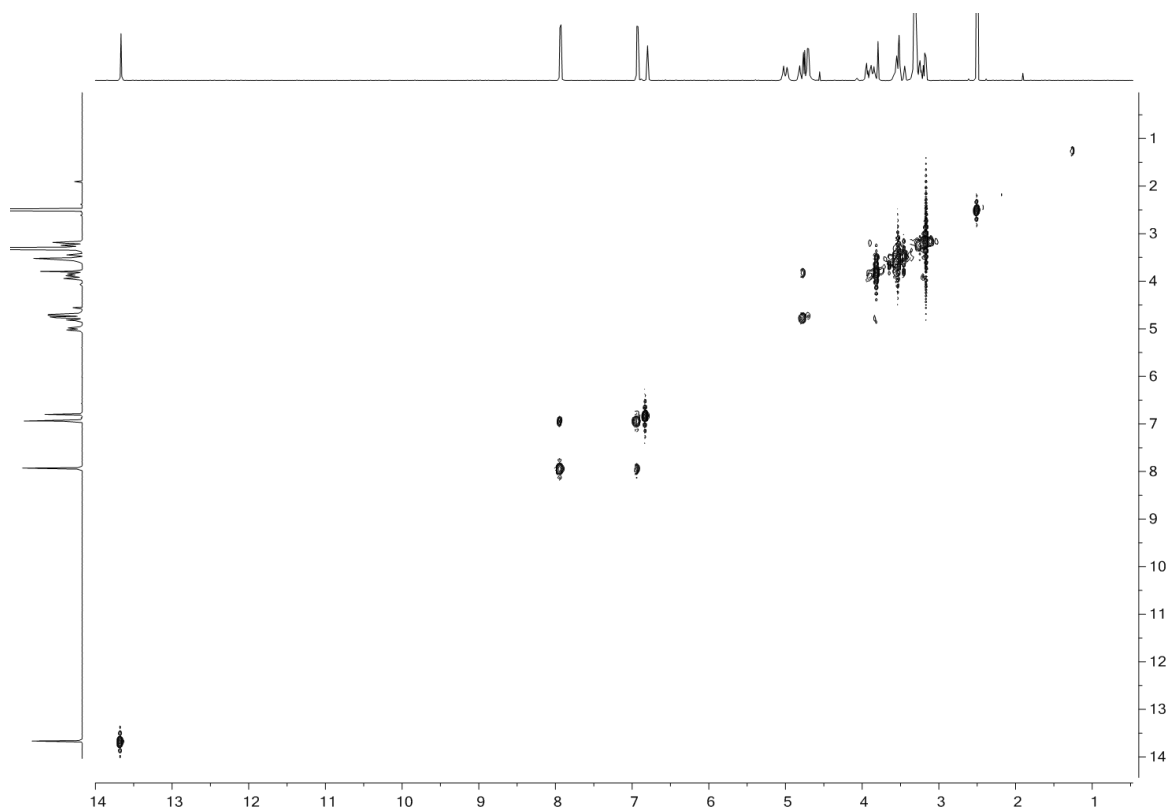

**Fig. 22S** gCOSY spectrum of NP\_564 acquired in DMSO-*d*<sub>6</sub> (800 MHz).

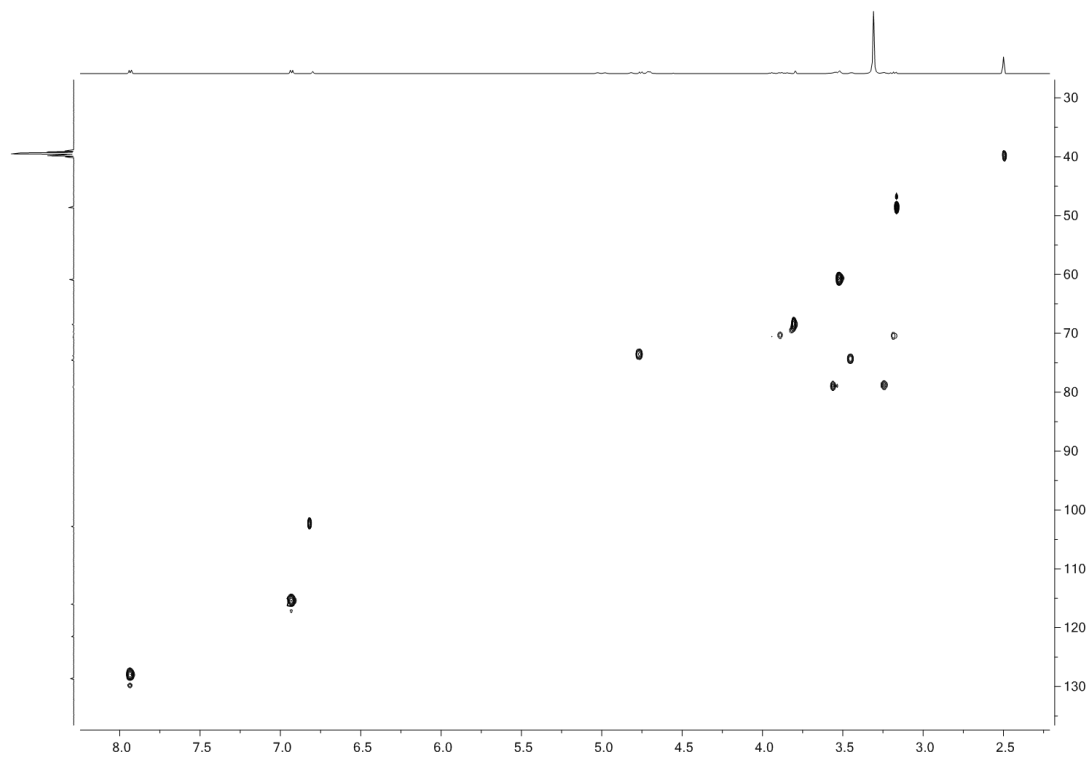

**Fig. 23S** HSQCAD spectrum of NP\_564 acquired in DMSO-*d*<sub>6</sub> (800 MHz).

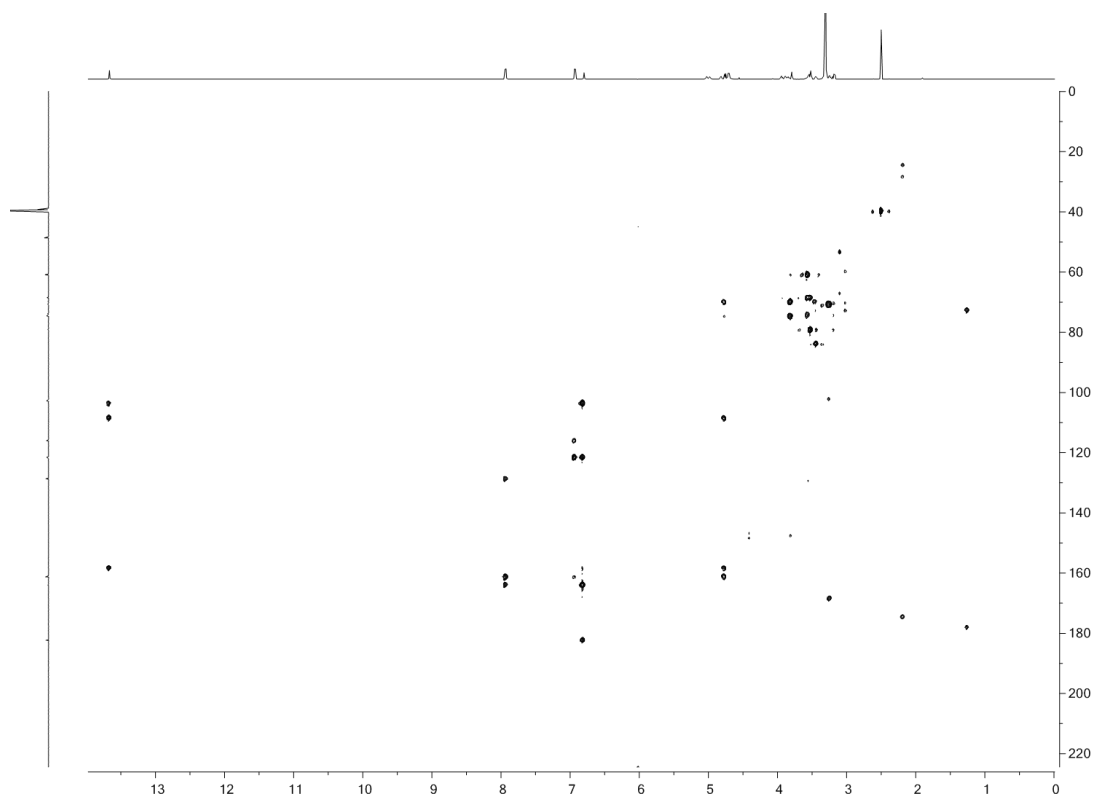

**Fig. 24S** HMBCAD spectrum of NP\_564 acquired in DMSO- $d_6$  (800 MHz).

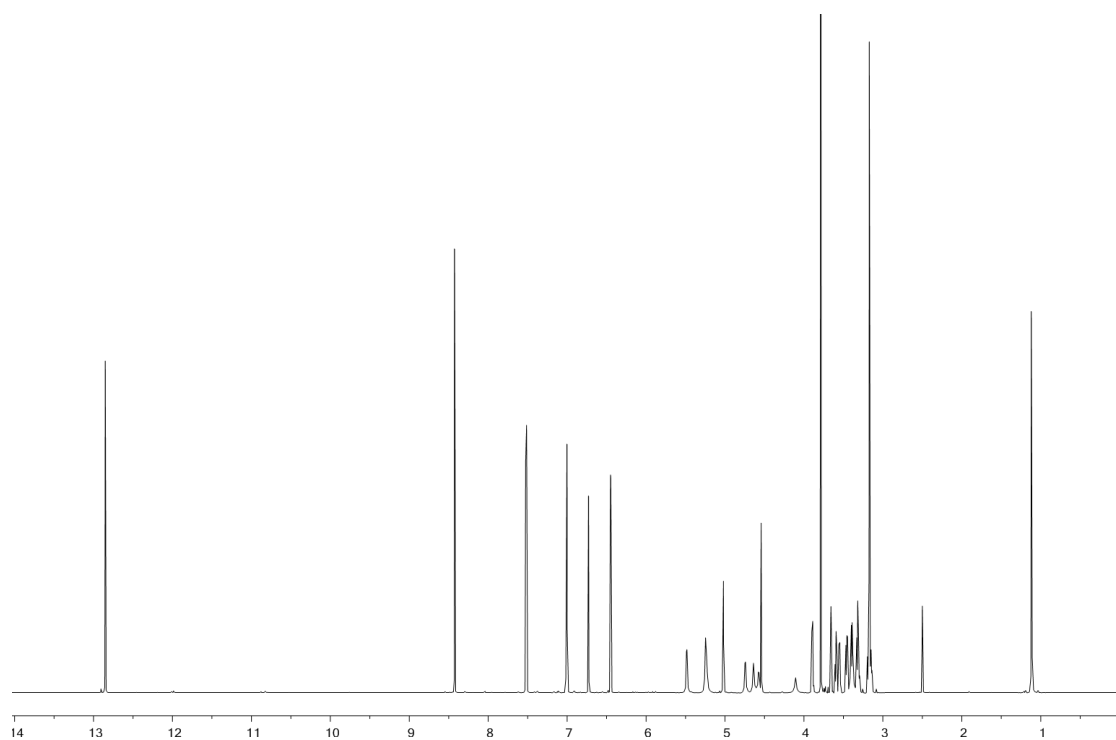

**Fig. 25S**  $^1\text{H}$ -NMR spectrum of NP\_592 acquired in DMSO- $d_6$  (800 MHz).

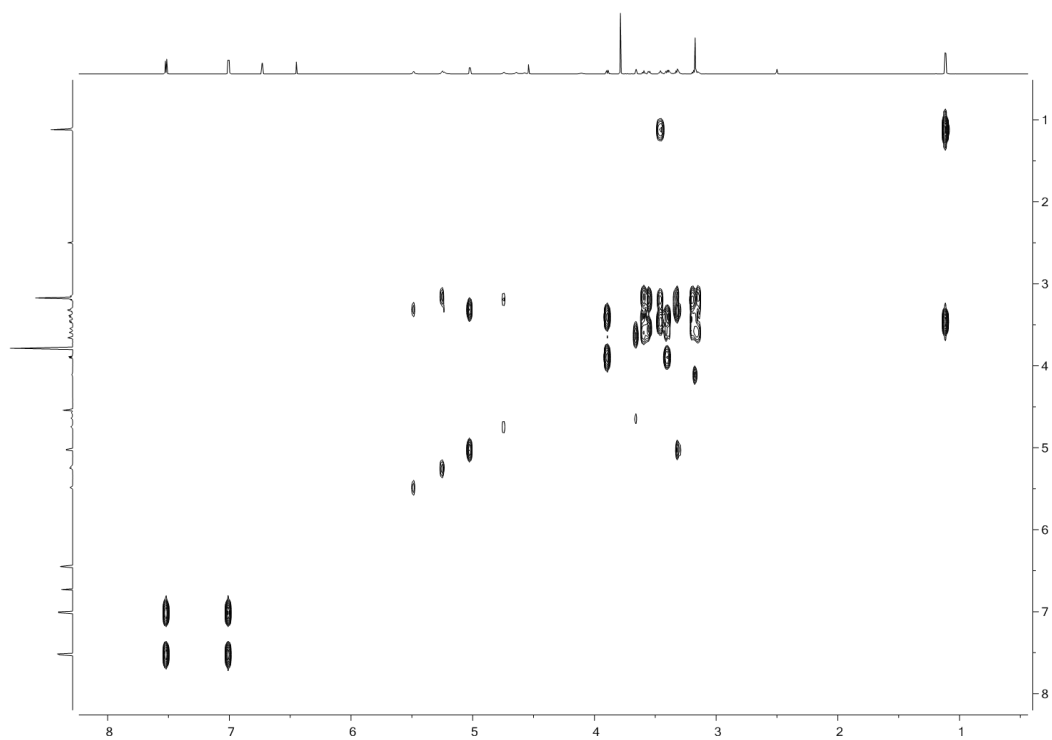

**Fig. 26S** gCOSY spectrum of NP\_592 acquired in DMSO-*d*<sub>6</sub> (800 MHz).

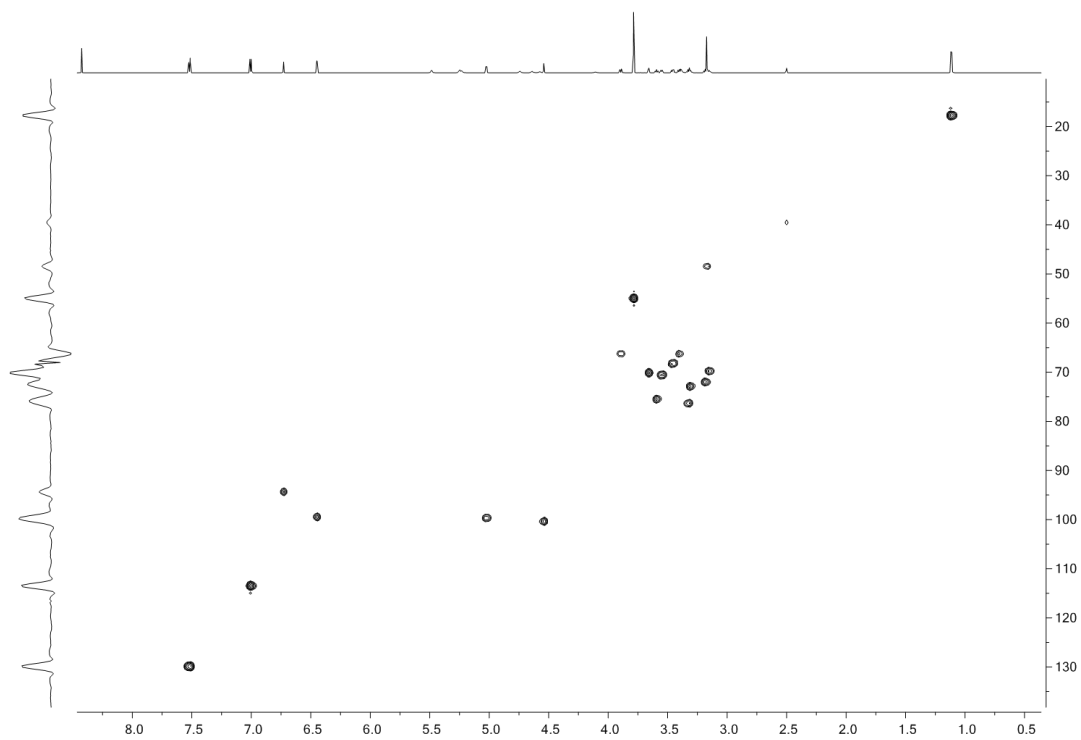

**Fig. 27S** HSQCAD spectrum of NP\_592 acquired in DMSO-*d*<sub>6</sub> (800 MHz).

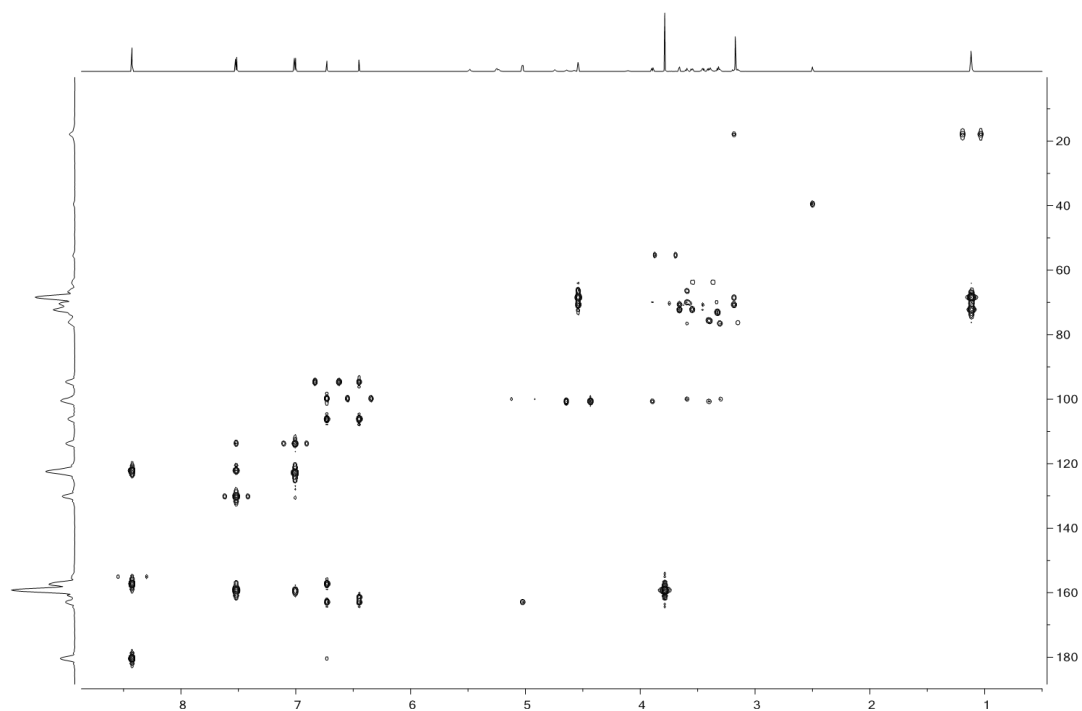

**Fig. 28S** HMBCAD spectrum of NP\_592 acquired in DMSO- $d_6$  (800 MHz).

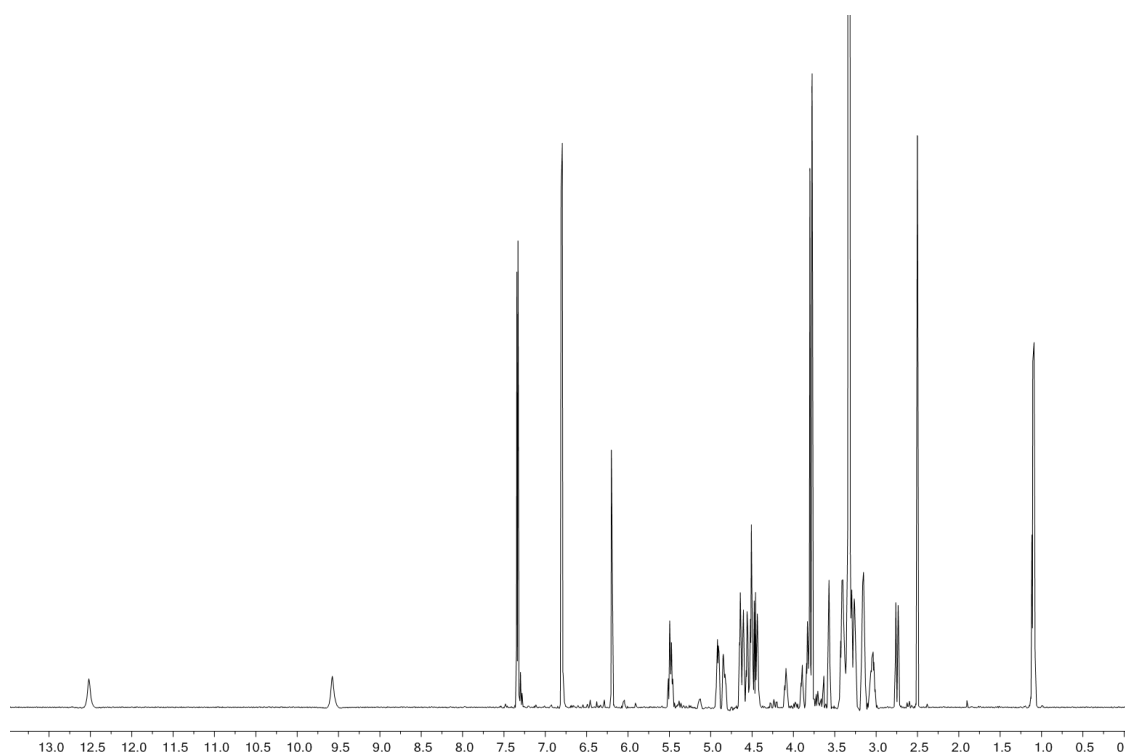

**Fig 29S**  $^1\text{H}$ -NMR spectrum of NP\_594 acquired in DMSO- $d_6$  (800 MHz).



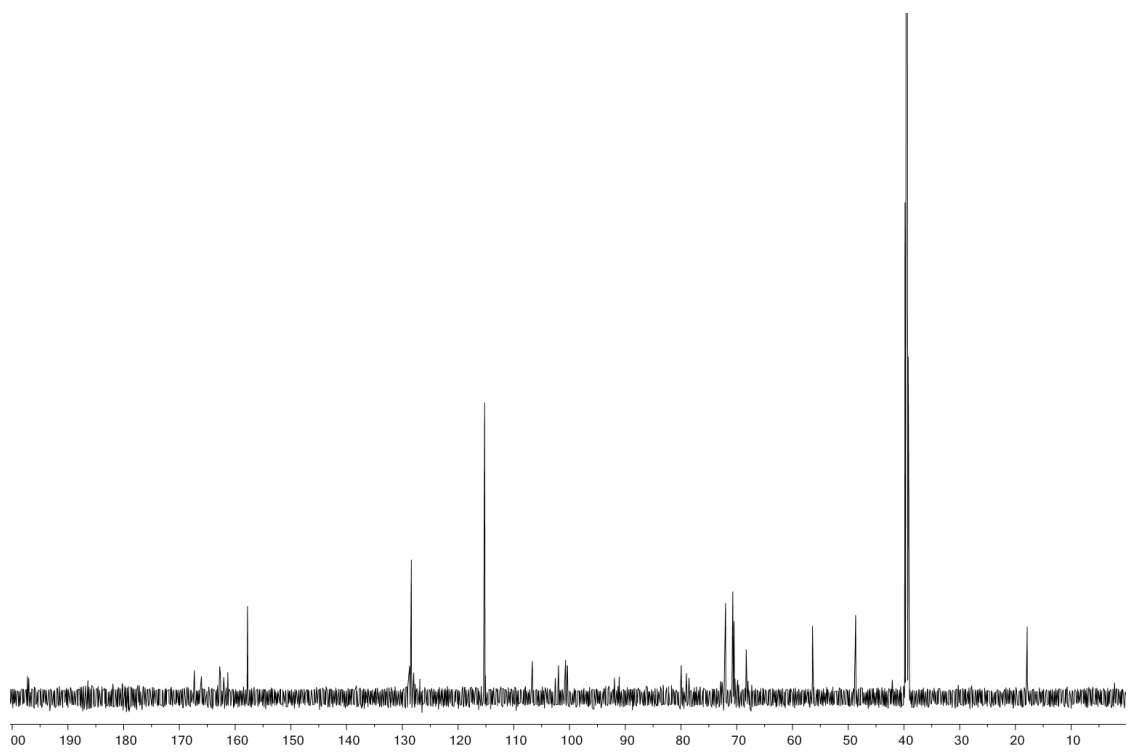

**Fig. 30S**  $^{13}\text{C}$ -NMR spectrum of NP\_594 acquired in  $\text{DMSO-}d_6$  (800 MHz).

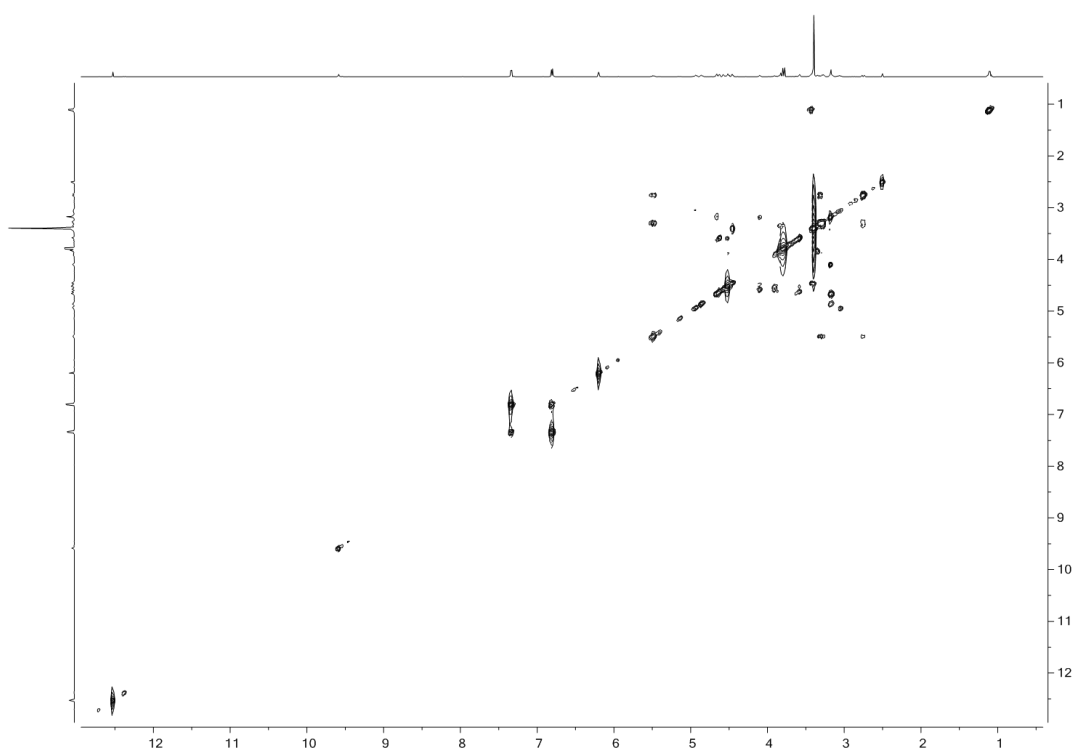

**Fig. 31S** gCOSY spectrum of NP\_594 acquired in  $\text{DMSO-}d_6$  (800 MHz).

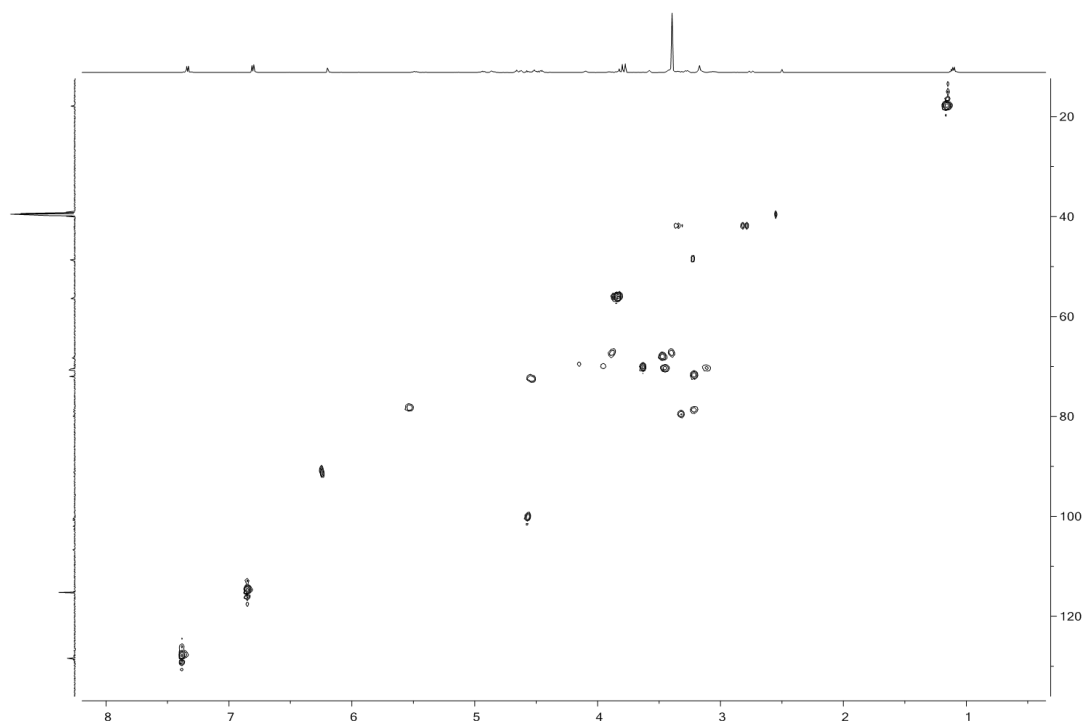

**Fig. 32S** HSQCAD spectrum of NP\_594 acquired in DMSO- $d_6$  (800 MHz).

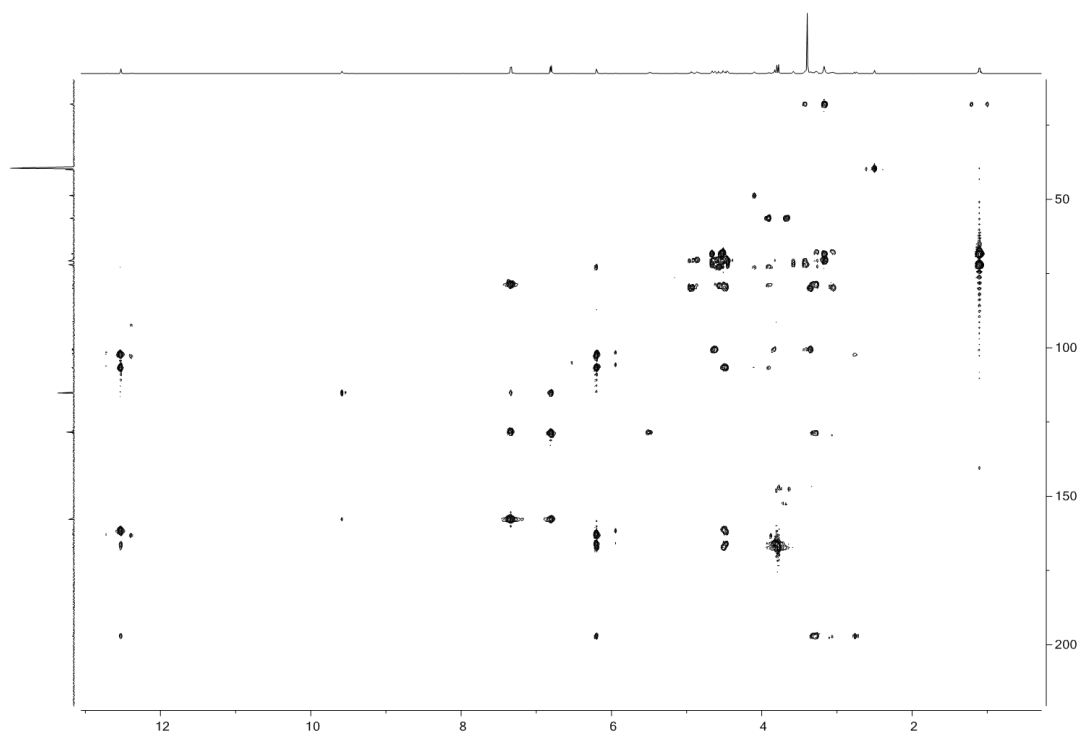

**Fig. 33S** HMBCAD spectrum of NP\_594 acquired in DMSO- $d_6$  (800 MHz).

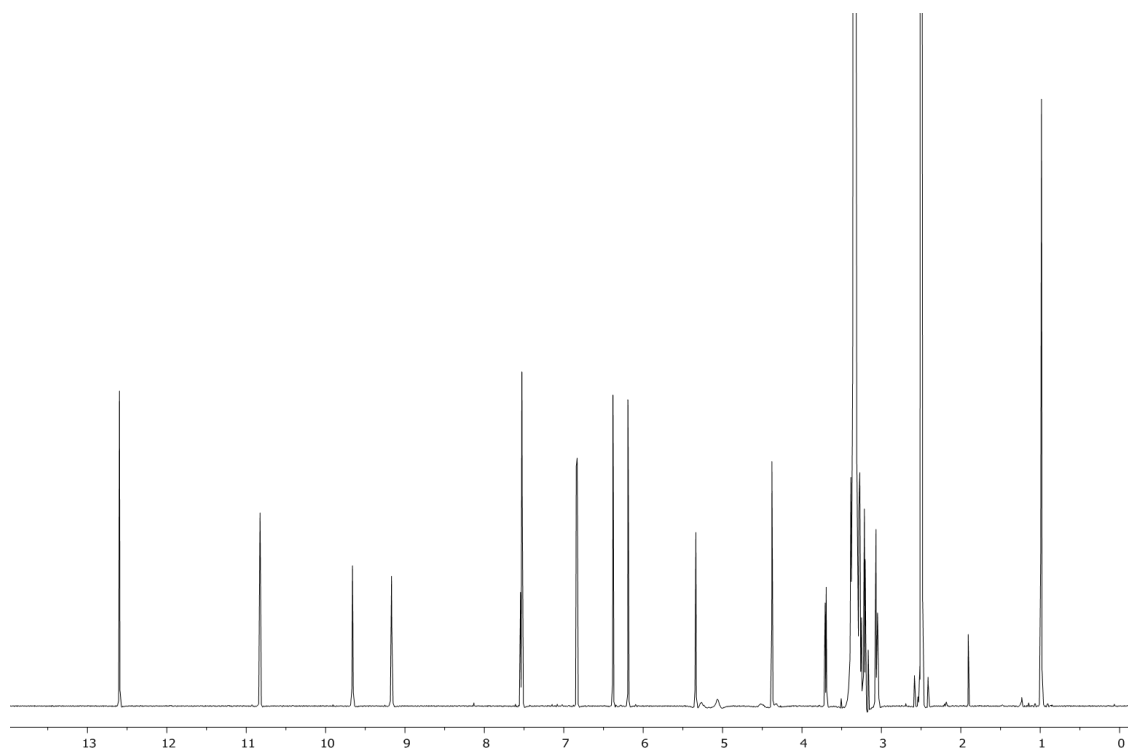

**Fig. 34S**  $^1\text{H-NMR}$  spectrum of NP\_610 acquired in  $\text{DMSO-}d_6$  (800 MHz).

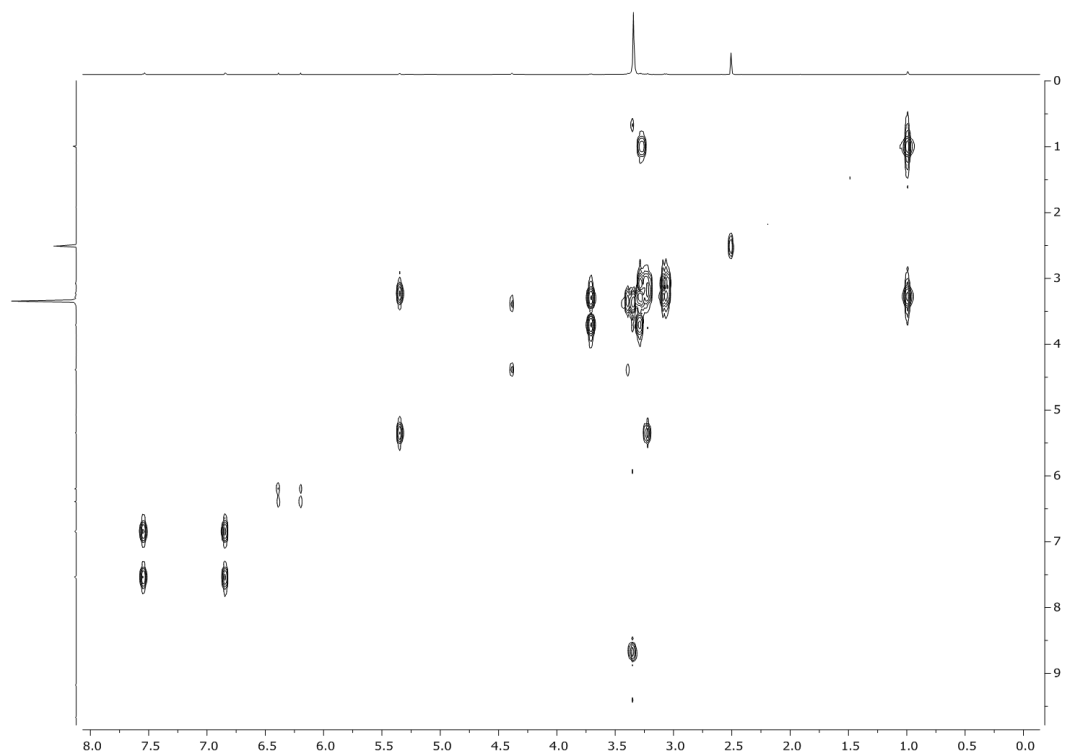

**Fig. 35S** gCOSY spectrum of NP\_610 acquired in  $\text{DMSO-}d_6$  (800 MHz).

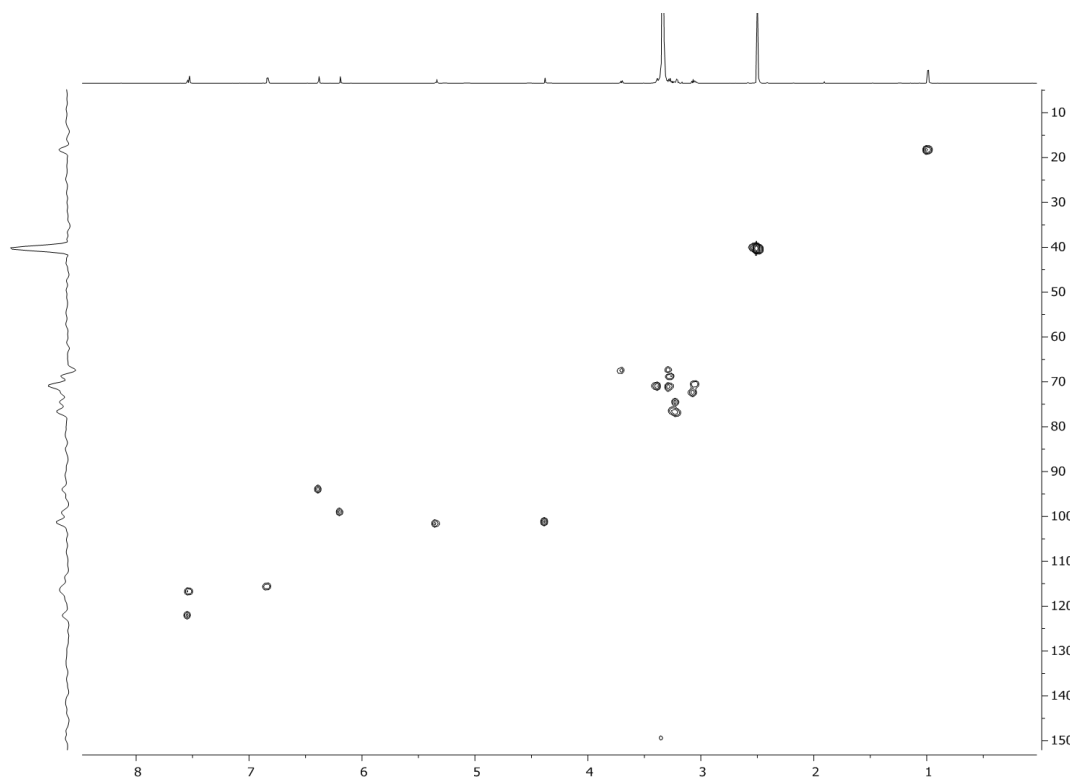

**Fig. 36S** HSQCAD spectrum of NP\_610 acquired in DMSO- $d_6$  (800 MHz).

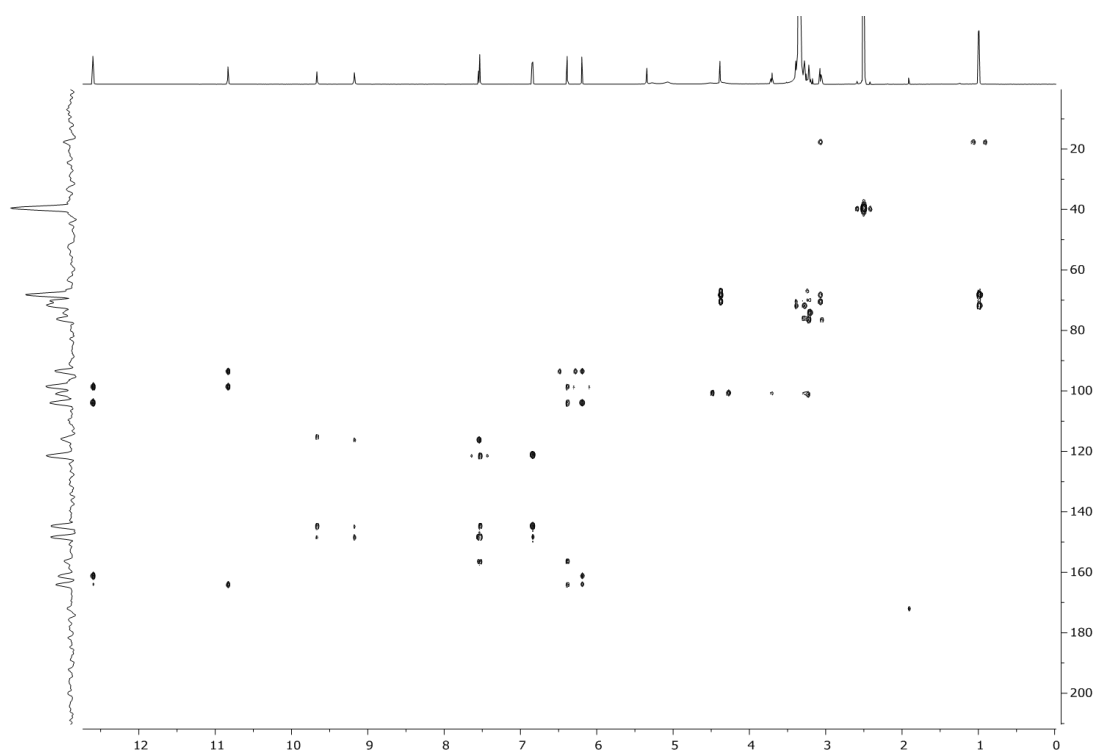

**Fig. 37S** HMBCAD spectrum of NP\_610 acquired in DMSO- $d_6$  (800 MHz).

**Table 1S** The amino acid sequences of the proteins that were used for the screening of natural products.

| Protein      | Sequence                                                                                                                     |
|--------------|------------------------------------------------------------------------------------------------------------------------------|
| Human S100A4 | ACPLEKALDVMVSTFHKYSGKEGDKFKLNKSELKELLTRELPSFLG<br>KRTDEAAFQKLMSNLDSNRDNEVDFQEYCVFLSCIAMMCNEFFEG<br>FPDKQPRKK                 |
| Mouse TIM3   | MDGYKVEVGKNAYLPCSYTLPTSGTLVPMCWGKGFCPWSQCTNE<br>LLRTDERNVTYQKSSRYQLKGDNLKGDVSLIKNVTLDDHGTYCC<br>RIQFPGLMNDKKLELKLDIK         |
| Human TIGIT  | MMTGTIETTGNISAEEKGGSILQCHLSSTTAQVTQVNWEQQDQLLAI<br>CNADLGWHISPSFKDRVAPGPGLGLTLQSLTVNDTGEYFCIYHTYP<br>DGTYTGRIFLEVLESSVAEHGAR |

**Table 2S** Base intensities of the proteins in different concentrations.

| Protein                 | Dilution ( $\mu$ M) | <sup>¥</sup> Absolute intensity |
|-------------------------|---------------------|---------------------------------|
| S100A4 /                | 87.4                | 5385071.566                     |
| S100A4-Ca <sup>2+</sup> | 17.5*               | 3238729.667                     |
|                         | 3.5                 | 2758871.333                     |
| TIM3                    | 79.5                | 6345214.356                     |
|                         | 15.9*               | 3395112.630                     |
|                         | 3.2                 | 864610.564                      |
| TIGIT                   | 69.1                | 21167179.563                    |
|                         | 13.8*               | 30268892.365                    |
|                         | 2.7                 | 246100.5642                     |

<sup>¥</sup>Average intensity of 10 replicates; \*Optimum concentration for ESI-FTMS screening

**Table 3S** Gradient timetable for lead-like enhanced fractionations.

| No. | Time (min) | Flow (mL/min) | % B   | % C  |
|-----|------------|---------------|-------|------|
| 1   | 0.01       | 4.00          | 10.0  | 90.0 |
| 2   | 3.00       | 4.00          | 50.0  | 50.0 |
| 3   | 3.01       | 3.00          | 50.0  | 50.0 |
| 4   | 6.50       | 3.00          | 100.0 | 0.0  |
| 5   | 7.00       | 3.00          | 100.0 | 0.0  |
| 6   | 7.01       | 4.00          | 100.0 | 0.0  |
| 7   | 8.00       | 4.00          | 100.0 | 0.0  |
| 8   | 9.00       | 4.00          | 10.0  | 90.0 |
| 9   | 11.00      | 4.00          | 10.0  | 90.0 |

B: 0.1% Trifluoroacetic acid in methanol

C: 0.1% Trifluoroacetic acid in water

**Table 4S** Optimum conditions for critical instrumental parameters in Bruker Apex III 4.7 Tesla in the positive ESI mode.

| Source parameter                              | Screening conditions |
|-----------------------------------------------|----------------------|
| Sample flow rate ( $\mu\text{L/h}$ )          | 120                  |
| Drying gas flow rate (L/min)                  | 40                   |
| Drying gas temperature ( $^{\circ}\text{C}$ ) | 125                  |
| Nebulizer gas pressure (psi)                  | 50                   |
| Capillary voltage (V)                         | -5000                |
| End Plate voltage (V)                         | -3500                |
| Capillary exit voltage (V)                    | 100                  |
| Skimmer 1 (V)                                 | 24.5                 |
| Skimmer 2 (V)                                 | 24.0                 |
| Hexapole RF amplitude (Hz)                    | 600                  |
| Hexapole DC offset (V)                        | 1.5                  |
| Hexapole accumulation time (s)                | 3                    |
| Tripple voltage (V)                           | 23                   |
| Excitation voltage (V)                        | -10                  |

**Table 5S** Optimum conditions for critical instrumental parameters in Bruker SolariX 12 Tesla in the positive ESI mode.

| Instrumental parts | Parameters                                              | Screening conditions |
|--------------------|---------------------------------------------------------|----------------------|
| Syringe pump       | Sample Flow rate ( $\mu\text{L/h}$ )                    | 120                  |
| API source         | Capillary (V)                                           | -4500                |
|                    | End plate off set (V)                                   | -1000                |
| Source gas tune    | Nebulizer (bar) <sup>t</sup>                            | 1-2                  |
|                    | Dry gas (L/min) <sup>t</sup>                            | 4-6                  |
|                    | Dry gas temperature ( $^{\circ}\text{C}$ ) <sup>m</sup> | 120-200              |
| Ion transfer       |                                                         |                      |
| Source optics      | Capillary exit (V)                                      | 220.0                |
|                    | Deflector plate (V)                                     | 250.0                |
|                    | Funnel 1 (V) <sup>t</sup>                               | *110.0-150           |
|                    | Skimmer 1 (V) <sup>t</sup>                              | *15.0-30.0           |
|                    | Funnel RF Amplitude (Vpp)                               | 250.0                |
| Octopole           | Frequency (MHz) <sup>m</sup>                            | 2-5                  |
|                    | RF amplitude (Vpp)                                      | 200.0                |
| Quadrupole         | Q1 mass ( $m/z$ )                                       | 600.0                |
| Collision cell     | Collision Cell (V)                                      | -3.0                 |
|                    | DC Extracts Bias (V)                                    | 0.1                  |
|                    | RF Frequency (MHz)                                      | 2                    |
|                    | Collision RF Amplitude (Vpp)                            | 2000.0               |
| Transfer optics    | Time of Flights (ms) <sup>t</sup>                       | 1.500-2.500          |
|                    | Frequency (MHz)                                         | 2                    |
|                    | RF amplitude (Vpp)                                      | 450.0                |
| Magnitude          | Size <sup>t</sup>                                       | 1-2M                 |
|                    | Mass range <sup>m</sup>                                 | 294.85-10000.00      |
|                    | Average scans / number of scans <sup>a</sup>            | 16-64                |
|                    | Accumulation time (s) <sup>t</sup>                      | 0.7-1.5              |

Screening conditions were varied during: <sup>t</sup> tuning for the proteins or samples, <sup>m</sup> method setup for the proteins, <sup>a</sup> acquisition of the sample spectra

**Table 6S** Gradient timetable for LC-HRMS analysis of extracts.

| No. | Time (min) | Flow (mL/min) | % B   | % C  |
|-----|------------|---------------|-------|------|
| 1   | 0.01       | 1.00          | 5.0   | 95.0 |
| 2   | 2.50       | 1.00          | 5.0   | 95.0 |
| 3   | 16.0       | 1.00          | 100.0 | 0.0  |
| 4   | 18.0       | 1.00          | 100.0 | 0.0  |
| 5   | 20.0       | 1.00          | 5.0   | 95.0 |

B: 0.1% Formic acid in methanol  
C: 0.1% Formic acid in water

**Table 7S** Optimum conditions for critical instrumental parameters of Bruker MaXis II OTOF in the positive ESI mode.

| Instrument parameters |                              | Optimum conditions |
|-----------------------|------------------------------|--------------------|
| Source                | End Plate Offset (V)         | -450               |
|                       | Capillary (V)                | -4500              |
|                       | Nebulizer (Bar)              | 1.0                |
|                       | Dry Gas (L/min)              | 5.0                |
|                       | Dry temperature (°C)         | 120                |
| Tune                  |                              |                    |
| Transfer              | Funnel 1 RF (Vpp)            | -15.0              |
|                       | isCID energy (eV)            | 0.0                |
|                       | Multiple RF (Vpp)            | -110.0             |
| Quadrupole            | Ion Energy (eV)              | -0.1               |
|                       | Low Mass ( $m/z$ )           | 80                 |
| Collision cell        | Collision (eV)               | -5.0               |
|                       | Collision RF (Vpp)           | -500.0             |
|                       | Transfer time ( $\mu$ s)     | 100.0              |
|                       | Pre Pulse Storage ( $\mu$ s) | 5.0                |



**Table 8S** Charge deconvolution parameters used for LC-HRMS analysis of extracts.

| Parameters                | Deconvolution conditions (+ESI, MS)          |
|---------------------------|----------------------------------------------|
| Adduct ions               | [M + H] <sup>+</sup> , [M + Na] <sup>+</sup> |
| Mass range ( <i>m/z</i> ) | 250-4000                                     |
| Abundance cutoff (%)      | 2.5                                          |
| Maximum charge            | Auto                                         |
| Signal-to-noise ratio     | 4                                            |

**Table 9S** Gradient timetable for LC-LRMS analysis of extracts.

| No. | Time (min) | Flow (mL/min) | % B   | % C  |
|-----|------------|---------------|-------|------|
| 1   | 0.01       | 1.00          | 5.0   | 95.0 |
| 2   | 1.00       | 1.00          | 5.0   | 95.0 |
| 3   | 10.0       | 1.00          | 100.0 | 0.0  |
| 4   | 11.0       | 1.00          | 100.0 | 0.0  |
| 5   | 12.0       | 1.00          | 5.0   | 95.0 |

B: 0.1% Formic acid in methanol  
C: 0.1% Formic acid in water
